1 **Title:** PhyteByte: Identification of foods containing compounds with specific pharmacological properties

2

3 **Authors:** Kenneth Westerman<sup>1,2</sup>, Sean Harrington<sup>3</sup>, Jose M Ordovas<sup>1</sup>, Laurence D Parnell<sup>4</sup>

4

5 **Corresponding author:** LDP, [laurence.parnell@usda.gov](mailto:laurence.parnell@usda.gov)

6 **Affiliations:** <sup>1</sup>Nutrition and Genomics Laboratory, JM-USDA Human Nutrition Research Center on Aging at

7 Tufts University, Boston, MA USA

8 <sup>2</sup>Clinical and Translational Epidemiology Unit, Massachusetts General Hospital, Boston, MA USA

9 <sup>3</sup>Notemeal, Inc., Boston, MA USA

10 <sup>4</sup>USDA Agricultural Research Service, Nutrition and Genomics Laboratory, JM-USDA Human Nutrition

11 Research Center on Aging at Tufts University, Boston, MA USA

12

13

## Abstract

Background: Phytochemicals and other molecules in foods elicit positive health benefits, often by poorly established or unknown mechanisms. While there is a wealth of data on the biological and biophysical properties of drugs and therapeutic compounds, there is a notable lack of similar data for compounds commonly present in food. Computational methods for high-throughput identification of food compounds with specific biological effects, especially when accompanied by relevant food composition data, could enable more effective and more personalized dietary planning. We have created a machine learning-based tool (PhyteByte) to leverage existing pharmacological data to predict bioactivity across a comprehensive molecular database of foods and food compounds.

Results: PhyteByte uses a cheminformatic approach to structure-based activity prediction and applies it to uncover the putative bioactivity of food compounds. The tool takes an input protein target and develops a random forest classifier to predict the effect of an input molecule based on its molecular fingerprint, using structure and activity data available from the ChEMBL database. It then predicts the relevant bioactivity of a library of food compounds with known molecular structures from the FooDB database. The output is a list of food compounds with high confidence of eliciting relevant biological effects, along with their source foods and associated quantities in those foods, where available. Applying PhyteByte to the *PPARG* gene, we identified irigenin, sesamin, fargesin, and delta-sanshool as putative agonists of PPARG, along with previously identified agonists of this important metabolic regulator.

Conclusions: PhyteByte identifies food-based compounds that are predicted to interact with specific protein targets. The identified relationships can be used to prioritize food compounds for experimental or epidemiological follow-up and can contribute to the rapid development of precision approaches to new nutraceuticals as well as personalized dietary planning.

**Keywords:** Bioactivity, Food, Molecule, Natural compound, Nutrition, Protein target

## 41 **Background**

42 While a select set of essential nutrients for humans has been well characterized, there is an abundance of  
43 lesser-known compounds in the human diet, representing a type of exposure that has been referred to as the  
44 “dark matter” of the human exposome [1-2]. These dietary bioactive compounds can have meaningful effects  
45 on human phenotypes, to the extent that some, such as lutein and several flavonoids, are under discussion for  
46 the establishment of dietary recommended intakes [3]. Despite the potentially important cumulative effects of  
47 these compounds, little is known about their bioactivity in the body due to the difficulty of experimentally  
48 assaying thousands of compounds for activity against thousands of potential gene products, combined with the  
49 complexities of absorption, microbial interactions, and metabolism [4]. Cheminformatic methods, including  
50 quantitative structure activity relationship (QSAR) models, can provide *in silico* approaches to prioritize  
51 compounds and foods in experimental and epidemiological settings when only the structure of a food  
52 compound is known. Pharmaceutical drugs can provide a critical set of anchors for such models, as their  
53 primary biological mechanisms of action are typically well characterized.

54  
55 Computational approaches to generating hypotheses related to food and food compound bioactivity have been  
56 introduced [5-6]. However, existing methods have focused primarily on literature mining based on natural  
57 language processing, rather than optimizing for the output of food compound activities related to a given input  
58 gene or protein of interest. Methods described to date have used relatively basic QSAR methods, such as  
59 comparisons based on Tanimoto similarity scores, which may fail to capture important signals. Additionally,  
60 there can be significant utility in identifying the food(s) that contains a compound of interest both as a source  
61 material or in the formulation of a novel product. The growth of relevant databases containing pharmaceutical  
62 and food composition information continually offers opportunities to revisit and improve QSAR tools. The  
63 United States Department of Agriculture (USDA) has a long history of producing high-quality data for its food  
64 composition databases [7], and inclusion of established or potential health effects would be a useful extension  
65 of these data.

67 Here, we develop and demonstrate a machine learning-based approach, PhyteByte, that assigns putative  
68 bioactivity to food compounds based on a training set of pharmaceutical drugs. We show the efficacy of  
69 PhyteByte using the specific example of PPARG, the known target of the thiazolidinedione (TZD) drug class.

## 71 **Implementation**

72 In order to identify functional relationships between a food compound and a drug, along with its associated  
73 bioactivity data, we used data from two sources: ChEMBL and FooDB. ChEMBL is a manually curated  
74 database of almost 2 million (1,879,206 in version 25) bioactive molecules with drug-like properties [8-9].  
75 These data were retrieved from [ebi.ac.uk/chembl/](http://ebi.ac.uk/chembl/) on 9/27/2019. FooDB (version 1.0) is a comprehensive  
76 resource on food constituents, chemistry and biology, with over 85,000 compounds in its repository [10]. These  
77 data were accessed from [foodb.ca](http://foodb.ca) on 9/27/2019. As allele-specific binding data are not available in ChEMBL,  
78 PhyteByte currently does not have the means to incorporate genetic variants into its prediction.

80 The PhyteByte computational pipeline is outlined in Figure 1 (along with details related to a specific gene input;  
81 see **Results & Discussion**). The processing of data through PhyteByte is initiated by selection of an input  
82 protein target query, from which drugs acting on that target (sourced from ChEMBL) are obtained to provide  
83 computational fingerprints of their molecular structure. The fingerprints are processed by a predictive model to  
84 yield likely bioactivity for food compounds (sourced from FooDB), which in turn are queried in FooDB to  
85 retrieve foods containing those compounds, with quantified amounts where available.

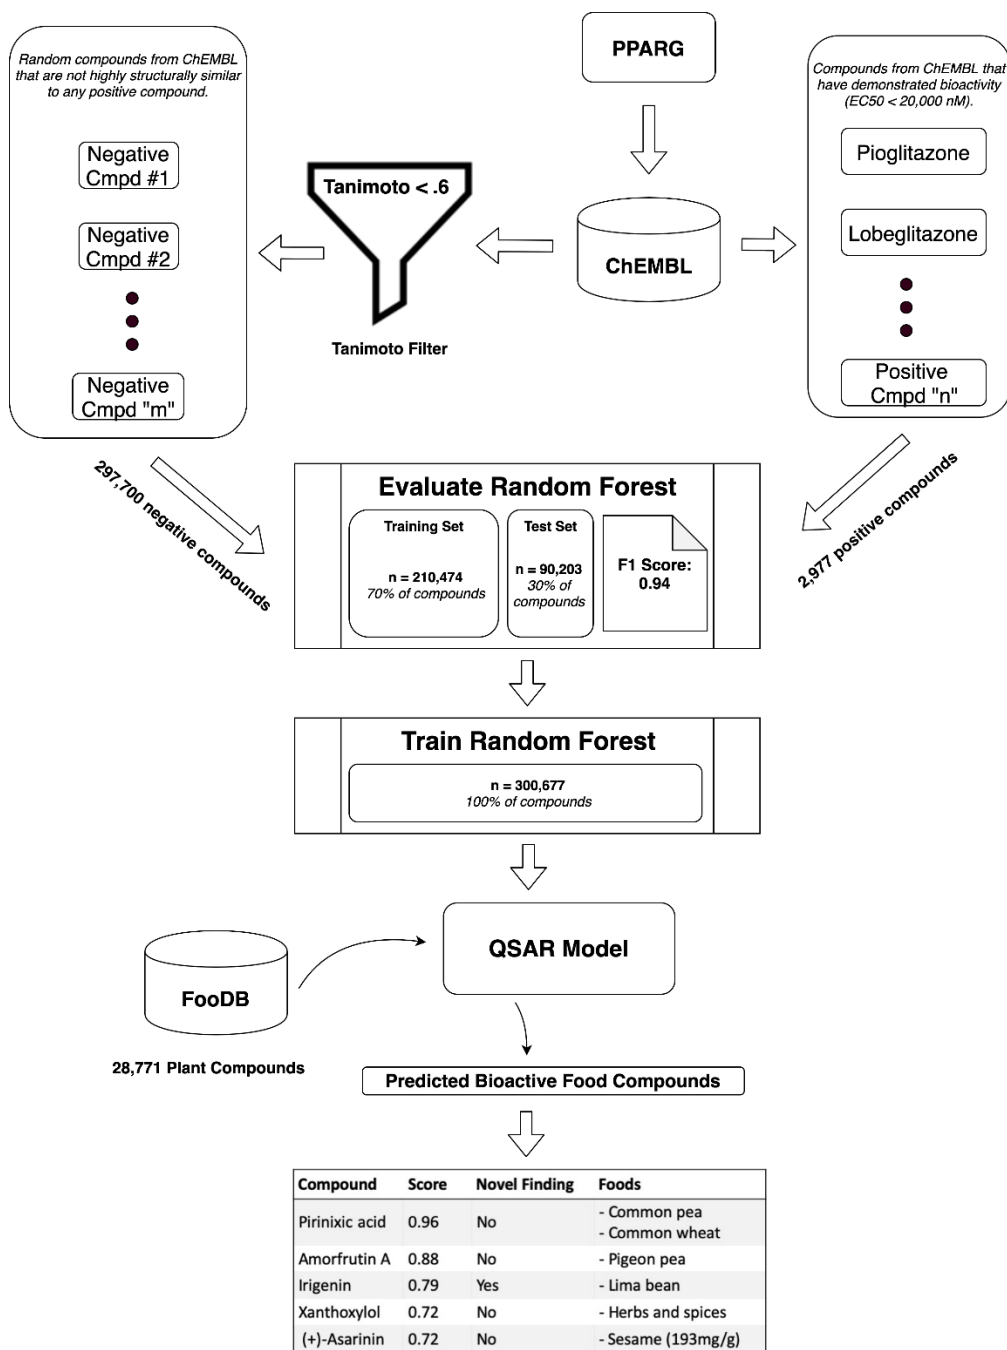

**Figure 1.** Schematic data flow for PhyteByte from protein target input to predicted bioactive food compounds.

Specifically, a target specification (provided in the form of an HGNC gene symbol) serves as input for a query to ChEMBL that retrieves chemical structures for molecules with evidence of relevant bioactivity for the protein encoded by that gene. Bioactivity is defined as an IC<sub>50</sub> (inhibitory concentration: the concentration of the molecule required to inhibit the biochemical function of the target by 50%) or EC<sub>50</sub> (effective concentration; the concentration of the molecule required to induce 50% of the maximal response or effect on the target) of

95 <20,000 nM based on the user-specified compound effect type (antagonist vs. agonist). Because ChEMBL  
96 does not contain explicit annotations as to the effect type, a heuristic is used in which the strength of  
97 antagonists and agonists are evaluated using IC50 and EC50 values, respectively. Compound structures are  
98 retrieved as simplified molecular-input line-entry system (SMILES) strings. SMILES strings are a dense,  
99 character-based representation of chemical compounds (for example,  
100 “COC1=CC(=CC(=C1OC)O)C2=COC3=C(C2=O)C(=C(C(=C3)O)OC)O” for irigenin, a compound in Table 1).  
101 The SMILES strings are then converted into FP2 binary fingerprints using the Pybel Python package [11],  
102 which acts as a wrapper for the OpenBabel chemical file format interconversion tool. FP2 fingerprints are a  
103 binary compound representation (as a 1024-bit vector) formulated based on the occurrence of specific linear  
104 fragments up to 7 atoms in length. Further details on the SMILES and FP2 formats are available from the Open  
105 Babel publication [12] and online Wiki (<https://openbabel.org>). A set of negative examples, chosen to be 10  
106 times the size of the positive set, is also retrieved at random from the full set of ChEMBL molecules. The  
107 negative examples are converted to FP2 fingerprints after filtering such that no negative compound has a  
108 Tanimoto similarity score >0.6 with any molecule in the positive set. The Tanimoto coefficient is defined as an  
109 association coefficient (in comparison to a distance coefficient) that measures similarity, here as chemical  
110 similarity based on SMILES representation of the molecule [13]; formulae for the Tanimoto coefficient are  
111 presented elsewhere [14]. No explicit upper limit for molecular mass of the bioactive molecules is set, but we  
112 note that the vast majority (>98%) of molecules in ChEMBL are categorized as small molecules.

113  
114 Next, a random forest model is trained (using the sklearn Python package) to classify compounds as to their  
115 bioactivity against the protein of interest. Inputs consist of the binary fingerprints (a binary feature vector of  
116 length 1024) and class labels (positive if evidence of bioactivity for the target exists in ChEMBL, or negative if  
117 not). The random forest classifier is an ensemble learning method that trains a set of independent decision  
118 trees to discriminate between positive and negative examples. Given a new compound (in this case, a food  
119 compound), binary predictions from each individual decision tree are averaged to output a probability of  
120 bioactivity. Models in PhyteByte use 100 component trees, with all additional parameters following sklearn  
121 defaults. The training and testing dataset split is created by assigning a random 30% of compounds to the

122 testing dataset (including a consistent random seed for reproducibility), with the remaining 70% assigned to the  
123 training dataset. We note that after evaluation, the final model used to process food compounds is trained on  
124 the full dataset. An initial indication of model performance is evaluated in a 30% held-out testing set using the  
125 F1 score, or the harmonic mean of precision and recall. This metric is calculated as  $F_1 = 2 * \frac{precision * recall}{precision + recall}$   
126 where precision is the fraction of predicted bioactive compounds that have evidence for bioactivity in ChEMBL,  
127 and recall is the fraction of compounds with evidence for bioactivity in ChEMBL that are predicted to be  
128 bioactive. True positive (TP) is defined as bioactivity in ChEMBL and predicted to be bioactive; false positive  
129 (FP) is defined as no bioactivity in ChEMBL but predicted to bioactive; false negative (FN) is defined as  
130 bioactivity in ChEMBL but not predicted to be bioactive. Thus, precision = TP / (TP + FP), recall = TP / (TP +  
131 FN), and F1 is calculated as above.

132 Using this trained model, the full set of food compounds available from FooDB are then characterized as to  
133 their probability of bioactivity with respect to the input protein. The list of probable dietary bioactive compounds  
134 is presented as output, along with their concentrations in foods as available in FooDB and an indication of  
135 whether the relationship is novel (i.e. does the compound lack existing evidence of bioactivity for the input  
136 protein in ChEMBL?). PhyteByte source code and installation instructions are available at  
137 <https://github.com/seanharr11/phytebyte>, and as a standalone tarball in Additional file 1 (capturing this  
138 repository at the time these analyses were performed).

## 140 **Results & Discussion**

141 We have demonstrated the functionality and output of PhyteByte using the input gene *PPARG* (ChEMBL235),  
142 whose protein product is the target of the thiazolidinedione (TZD) drug class. TZDs are widely prescribed to  
143 treat type 2 diabetes, and additionally may have broader cardiometabolic benefits [15]. However, TZDs also  
144 have documented side effects and FDA-issued alerts of adverse effects [16], suggesting a potential benefit of  
145 identifying alternative or complementary food-based bioactives. Details of the PhyteByte pipeline as realized  
146 for PPARG agonists are presented in Figure 1. 2977 positive compounds were retrieved from ChEMBL, along  
147 with 297,700 negative compounds. The trained model exhibited an F1 score (harmonic mean of precision and  
148 recall) of 0.94 in a 30% held-out set, indicating a reasonably strong discriminative capacity within the set of

149 molecules in ChEMBL. This score may be biased upwards due to limitations in the set of pharmaceutical  
150 compounds explored to date, but nonetheless indicates an ability to classify potential food compounds  
151 effectively.

152  
153 When used to score compounds from FooDB, the model identified a series of molecules with potential agonist  
154 bioactivity for PPARG. Table 1 lists the 10 molecules with a predicted bioactivity confidence of greater than  
155 0.60 that also had associated foods in FooDB; tabulated results include the identified food compound, common  
156 synonyms, CAS and FooDB identifiers, PhyteByte output score, whether the compound-PPARG interaction is  
157 a novel finding, and foods reported to contain that compound. Molecules such as pirinixic acid (or WY-14643)  
158 and xanthoxylol have been shown to activate PPARG [17-19], albeit the latter only as an activator of *PPARG*  
159 transcription [20]. Other molecules have little to no existing evidence in the scientific literature of acting as  
160 PPARG agonists. These include irigenin (an O-methylated flavone found in lima bean), sesamin (a lignan  
161 found in sesame and flaxseed), fargesin (a lignan from tea, herbs and spices), delta-sanshool (an n-acyl amine  
162 from herbs and spices), and the lignan sanshodiol (from herbs and spices). Such molecules could be  
163 prioritized for detailed experimental validation. Complete output of PhyteByte for PPARG as input and resulting  
164 identified compounds scoring above 0.50 is presented in Additional file 2.

165  
166 Tools such as PhyteByte consider only small molecules and are limited by the content of the input databases.  
167 Importantly, these resources are expected to become increasingly comprehensive, especially for food  
168 compounds. For example, efforts are underway by the USDA to expand their food composition databases [7],  
169 and recent investigations have identified additional compounds produced during food processing [21] and by  
170 human microbiota [22], which may promote certain health effects. While QSAR models are susceptible to false  
171 positives due to activity cliffs (key discontinuities in the structure-activity landscape), outputs from PhyteByte  
172 are intended to be only putative structure-activity relationships to be explored further through complementary  
173 computational and laboratory methods [23]. Experimental and/or epidemiological assessment eventually will be  
174 required to validate at least some subset of the algorithmic predictions before this tool could be used in clinical  
175 settings or for dietary recommendations.



176

177 In future versions of the software, we anticipate more flexibility in both the inputs and databases. For example,  
178 inputs may include phenotypes (to be linked to a set of target gene products and user-defined food compound  
179 datasets following a pre-defined schema may be used to complement FooDB. Additionally, as more follow-up  
180 testing of food compound-target interactions is performed, those results can be used as a complementary  
181 source of interactions for PhyteByte and form the basis for a catalog of all such interactions for a single food.  
182 Complementary data streams, such as those based on text mining [5], pharmacology networks [24] or drug  
183 interaction data (to identify potential similar food compound interaction effects), could provide additional  
184 support for food compound-phenotype links. Future work also should include more fine-grained annotations of  
185 positive training molecules (based on type of effect on the target, strength, and mechanism of action) as well  
186 as alternative QSAR modeling approaches [25].

187

## 188 **Conclusions**

189 PhyteByte is a machine learning-based tool for discovery of interactions between food compounds and specific  
190 proteins or phenotypes. The software enables prioritization of these compounds for future research and  
191 hypothesis generation for condition-specific dietary interventions. Applied to the *PPARG* gene, this tool  
192 recovered known ligands and generated the basis for new hypotheses useful for cell-based assays or  
193 epidemiological inquiries. Our work provides additional proof-of-concept for the emerging field of  
194 “computational nutrition” based on food compounds, building on previous research that applied cheminformatic  
195 approaches to assign putative biological function to molecules of interest.

196

## 197 **Availability and requirements**

198 Project name: Phytebyte

199 Project home page: <https://github.com/seanharr11/phytebyte>

200 Operating system(s): Unix-based (MacOS, Linux)

201 Programming language: Python

202 Other requirements: Python 3.6 or higher

203 License: AGPLv3

204 Any restrictions to use by non-academics: License needed

205

## 206 **Abbreviations**

207 EC50 – effective concentration

208 IC50 – inhibitory concentration

209 PPARG – peroxisome proliferator activated receptor gamma

210 QSAR – quantitative structure activity relationship

211 SMILES – simplified molecular-input line-entry system

212 TZD – thiazolidinedione

213 USDA – United States Department of Agriculture

214

## 215 **Declarations**

216 Ethics approval and consent to participate – not applicable

217 Consent for publication – not applicable

218 Availability of data and materials – All data generated during this study are included in this published article  
219 and its supplementary information files. The ChEMBL and FooDB datasets analyzed during the current study  
220 are available at [ebi.ac.uk/chembl/](http://ebi.ac.uk/chembl/) and [foodb.ca](http://foodb.ca) [8-10].

221 Competing interests – SH is a founder and employee of Notemeal, Inc, a company building a software platform  
222 for performance dietitians to manage athlete nutrition. This entity currently has no relation to or use of the  
223 findings described here. All other authors declare that they have no competing interests.

224 Funding – This work was funded in part by United States Department of Agriculture project number 8050-  
225 51000-107-00D.

226 Authors' contributions – KW, SH and LDP conceived of, designed, wrote and tested PhyteByte, and/or  
227 analyzed results. KW, SH and LDP wrote, and all authors reviewed and approved the submitted manuscript.  
228 JMO provided financial support to KW and LDP.

229 Acknowledgements – Mention of trade names or commercial products in this publication is solely for the  
230 purpose of providing specific information and does not imply recommendation or endorsement by the U.S.  
231 Department of Agriculture. The USDA is an equal opportunity provider and employer.

## 233 References

- 234 1. Uppal K, Walker DI, Liu K, Li S, Go YM, Jones DP. Computational metabolomics: A framework for the  
235 million metabolome. *Chem Res Toxicol.* 2016;29(12):1956-75.
- 236 2. Barabási AL, Menichetti G, Loscalzo J. The unmapped chemical complexity of our diet. *Nat Food.* 2019  
237 doi:10.1038/s43016-019-0005-1.
- 238 3. Wallace TC, Blumberg JB, Johnson EJ, Shao A. Dietary bioactives: Establishing a scientific framework  
239 for recommended intakes. *Adv Nutr.* 2015;6(1):1-4.
- 240 4. Rein MJ, Renouf M, Cruz-Hernandez C, Actis-Goretta L, Thakkar SK, da Silva Pinto M. Bioavailability  
241 of bioactive food compounds: A challenging journey to bioefficacy. *Br J Clin Pharmacol.*  
242 2013;75(3):588-602.
- 243 5. Jensen K, Panagiotou G, Kouskoumvekaki I. NutriChem: A systems chemical biology resource to  
244 explore the medicinal value of plant-based foods. *Nucleic Acids Res.* 2015;43(Database issue):D940-5.
- 245 6. Ni Y, Jensen K, Kouskoumvekaki I, Panagiotou G. NutriChem 2.0: Exploring the effect of plant-based  
246 foods on human health and drug efficacy. *Database (Oxford).* 2017;2017:1-6.
- 247 7. Haytowitz DB, Pehrsson PR. USDA's National Food and Nutrient Analysis Program (NFNAP) produces  
248 high-quality data for USDA food composition databases: Two decades of collaboration. *Food Chem.*  
249 2018;238:134-8.
- 250 8. Gaulton A, Hersey A, Nowotka M, Bento AP, Chambers J, et al. The ChEMBL database in 2017.  
251 *Nucleic Acids Res.* 2017;45(D1):D945-54.
- 252 9. ChEMBL. <http://www.ebi.ac.uk/chembl/>. Accessed 27 Sep 2019.
- 253 10. FooDB. A resource on food constituents, chemistry and biology. [foodb.ca](http://foodb.ca). Accessed 27 Sep 2019.
- 254 11. O'Boyle NM, Morley C, Hutchison GR. Pybel: A Python wrapper for the OpenBabel cheminformatics  
255 toolkit. *Chem Cent J.* 2008;2:5.

- 256 12. O'Boyle NM, Banck M, James CA, Morley C, Vandermeersch T, Hutchison GR. Open Babel: An open  
257 chemical toolbox. *J Cheminform.* 2011;3:33.
- 258 13. Melville JL, Riley JF, Hirst JD. Similarity by compression. *J Chem Inf Model.* 2007;47(1):25-33.
- 259 14. Willett P, Barnard JM, Downs GM. Chemical similarity searching. *J Chem Inf Comput Sci.*  
260 1998;38(6):983-96.
- 261 15. Liu J, Wang LN. Peroxisome proliferator-activated receptor gamma agonists for preventing recurrent  
262 stroke and other vascular events in patients with stroke or transient ischaemic attack. *Cochrane*  
263 *Database Syst Rev.* 2015;29(10):CD010693.
- 264 16. Hong F, Xu P, Zhai Y. The opportunities and challenges of peroxisome proliferator-activated receptors  
265 ligands in clinical drug discovery and development. *Int J Mol Sci.* 2018;19(8):2189.
- 266 17. Zhou YC, Waxman DJ. Activation of peroxisome proliferator-activated receptors by chlorinated  
267 hydrocarbons and endogenous steroids. *Environ Health Perspect.* 1998;106 Suppl 4:983-8.
- 268 18. Knowles HJ, te Poele RH, Workman P, Harris AL. Niacin induces PPARgamma expression and  
269 transcriptional activation in macrophages via HM74 and HM74a-mediated induction of prostaglandin  
270 synthesis pathways. *Biochem Pharmacol.* 2006;71(5):646-56.
- 271 19. Temkin AM, Bowers RR, Magaletta ME, Holshouser S, Maggi A, et al. Effects of crude oil/dispersant  
272 mixture and dispersant components on PPAR $\gamma$  activity *in vitro* and *in vivo*: Identification of dioctyl  
273 sodium sulfosuccinate (DOSS; CAS #577-11-7) as a probable obesogen. *Environ Health Perspect.*  
274 2016;124(1):112-9.
- 275 20. Quang TH, Ngan NT, Minh CV, Kiem PV, Tai BH, et al. Anti-inflammatory and PPAR transactivational  
276 effects of secondary metabolites from the roots of *Asarum sieboldii*. *Bioorg Med Chem Lett.*  
277 2012;22(7):2527-33.
- 278 21. Gauglitz JM, Aceves CM, Aksenov AA, Aleti G, Almaliti J, et al. Untargeted mass spectrometry-based  
279 metabolomics approach unveils molecular changes in raw and processed foods and beverages. *Food*  
280 *Chem.* 2020;302:125290.
- 281 22. Rowland I, Gibson G, Heinken A, Scott K, Swann J, et al. Gut microbiota functions: Metabolism of  
282 nutrients and other food components. *Eur J Nutr.* 2018;57(1):1-24.

- 283 23. Stumpfe D, Hu Y, Dimova D, Bajorath J. Recent progress in understanding activity cliffs and their utility  
284 in medicinal chemistry. *J Med Chem.* 2014; 57(1);18-28.
- 285 24. Zhang B, Wang X, Li S. An integrative platform of TCM network pharmacology and its application on a  
286 herbal formula, *Qing-Luo-Yin*. *Evid Based Complement Alternat Med.* 2013;2013:456747.
- 287 25. Neves BJ, Braga RC, Melo-Filho CC, Moreira-Filho JT, Muratov EN, Andrade CH. QSAR-based virtual  
288 screening: Advances and applications in drug discovery. *Front Pharmacol.* 2018;9:1275.

289

290

291

**Table 1. Top food compound results from PhyteByte for input of PPARG.**

| Compound                     | Synonyms                                                                                                                             | CAS ID <sup>1</sup> | FooDB ID  | Score <sup>2</sup> | Novel | Foods <sup>3</sup><br>finding                |
|------------------------------|--------------------------------------------------------------------------------------------------------------------------------------|---------------------|-----------|--------------------|-------|----------------------------------------------|
| <b>Pirinixic acid</b>        | 2-Methylthioribosyl-trans-zeatin; WY-14,643; CXPTA                                                                                   | 50892-23-4          | FDB001402 | 0.96               | False | pea, wheat                                   |
| <b>Amorfrutin A</b>          | 3-Hydroxy-4-isopentenyl-5-methoxybibenzyl-2-carboxylic acid                                                                          | 80489-90-3          | FDB001743 | 0.88               | False | pigeon pea                                   |
| <b>Irigenin</b>              | 5,7,3'-Trihydroxy-6,4',5'-trimethoxyisoflavone                                                                                       | 548-76-5            | FDB008016 | 0.79               | True  | lima bean, iris<br>kemaonensis, leopard lily |
| <b>Xanthoxylol</b>           | (-)-Piperitol                                                                                                                        | 54983-95-8          | FDB000580 | 0.72               | False | herbs and spices, Asarum sieboldii           |
| <b>Sesamin</b>               | (+)-Asarinin; Fagarol                                                                                                                | 607-80-7            | FDB012573 | 0.72               | False | sesame, flaxseed, fats and oils              |
| <b>2,3-Dihydrobenzofuran</b> | 2,3-Dihydro-1-benzofuran; Coumaran; Dihydrocoumarone                                                                                 | 496-16-2            | FDB007352 | 0.72               | True  | fenugreek                                    |
| <b>(+)-Fargesin</b>          | (+)-Spinescin; 2-(3',4'-Dimethoxyphenyl)-6-(3'',4''-methylenedioxyphenyl)-3,7-dioxabicyclo(3,3,0)octane; Methylpluviatilol; Planinin | 68296-27-5          | FDB017481 | 0.69               | True  | tea, herbs and spices                        |
| <b>delta-Sanshool</b>        | N-Isobutyl-2,4,8,10,12-tetradecapentaenamide; g-Sanshool                                                                             | 78886-65-4          | FDB003203 | 0.65               | True  | herbs and spices (general)                   |
| <b>Sanshodiol</b>            | (5-Chloro-2-hydroxyphenyl)acetic acid                                                                                                | 54854-91-0          | FDB002461 | 0.65               | True  | herbs and spices                             |
| <b>Samain</b>                |                                                                                                                                      | NA                  | FDB018392 | 0.61               | True  | fats and oils                                |

<sup>1</sup> Chemical Abstracts Service Registry Number for the compound

<sup>2</sup> Score represents the predicted probability of the compound acting as a PPARG agonist

<sup>3</sup> For results presented, data on compound amounts in food as extracted from FooDB were

available only for sesamin in sesame, range: 62.7 mg/100 g to 644.5 mg/100 g

**Additional file 2.**

| Compound                                                                      | Score | Novel Relationship | Foods                                                                                                                                                                      |
|-------------------------------------------------------------------------------|-------|--------------------|----------------------------------------------------------------------------------------------------------------------------------------------------------------------------|
| 2-Methylthioribosyl-trans-zeatin<br>FooDB ID: 1402                            | 0.96  | False              | - Common pea (None) None None<br>- Common wheat (None) None None                                                                                                           |
| 3-Hydroxy-4-isopentenyl-5-methoxybibenzyl-2-carboxylic acid<br>FooDB ID: 1743 | 0.88  | False              | - Pigeon pea (None) None None                                                                                                                                              |
| Irigenin<br>FooDB ID: 8017                                                    | 0.79  | True               | - Lima bean (Shoot) None None                                                                                                                                              |
| Xanthoxylol<br>FooDB ID: 580                                                  | 0.72  | False              | - Herbs and Spices (None) None None                                                                                                                                        |
| (+)-Asarinin<br>FooDB ID: 867                                                 | 0.72  | False              | - Sesame (None) 192.60 mg/100 g                                                                                                                                            |
| (-)-Piperitol<br>FooDB ID: 2761                                               | 0.72  | False              | - Herbs and Spices (None) None None                                                                                                                                        |
| Dihydrobenzofuran<br>FooDB ID: 7353                                           | 0.72  | True               | - Fenugreek (Seed) None None                                                                                                                                               |
| (+)-Sesamin<br>FooDB ID: 12576                                                | 0.72  | False              | - Sesame (None) 644.50 mg/100 g<br>- Sesame (None) 538.08 mg/100 g<br>- Sesame (None) 420.99 mg/100 g<br>- Sesame (None) 62.72 mg/100 g<br>- Flaxseed (None) None mg/100 g |
| (+)-Fargesin<br>FooDB ID: 17488                                               | 0.69  | True               | - Alcoholic beverages (None) None None<br>- Herbs and Spices (None) None None                                                                                              |
| (+)-Spinescin<br>FooDB ID: 18400                                              | 0.69  | True               | - Tea (None) None None<br>- Herbs and Spices (None) None None                                                                                                              |
| Sanshodiol<br>FooDB ID: 2461                                                  | 0.65  | True               | - Herbs and Spices (None) None None                                                                                                                                        |
| N-Isobutyl-2,4,8,10,12-tetradecapentaenamide<br>FooDB ID: 3204                | 0.65  | True               | - Herbs and Spices (None) None None                                                                                                                                        |
| Samin<br>FooDB ID: 18399                                                      | 0.61  | True               | - Fats and oils (None) None None                                                                                                                                           |

292
